# Supplementary material
Source: Springer Nature journal article supplement (https://mijn.bsl.nl/resource/supplementary/13047_2009_118_MOESM1_ESM.pdf/7473890)
Supplement: MOESM1 [file 7473890]

| <b>Circle only one number</b> | <b>Statement</b>                         |
|-------------------------------|------------------------------------------|
| 7                             | A very great deal better                 |
| 6                             | A great deal better                      |
| 5                             | A good deal better                       |
| 4                             | Moderately better                        |
| 3                             | Somewhat better                          |
| 2                             | A little better                          |
| 1                             | About the same, hardly any better at all |
| 0                             | No change                                |
| -1                            | About the same, hardly any worse at all  |
| -2                            | A little worse                           |
| -3                            | Somewhat worse                           |
| -4                            | Moderately worse                         |
| -5                            | A good deal worse                        |
| -6                            | A great deal worse                       |
| -7                            | A very great deal worse                  |

Note: The 'no change' group on the Likert scale was represented by scores in the range of '0 to +1' on the fifteen point Likert scale. The 'small change' (or minimal change) group was represented by scores in the range of '+2 to+3'.
